# Supplementary material for: On the performance of a hierarchically porous Ag2S–CuxS electrode in Li-ion batteries
Source: Royal Society of Chemistry journal article supplement (doi:10.1039/d2dt02880h), 2022-01-01
Supplement: d2dt02880h1.pdf [file d2dt02880h1.pdf]

## Supporting information

“On the performance of hierarchically porous  $\text{Ag}_2\text{S-Cu}_x\text{S}$  electrode in Li-ion batteries” by R. I. Tomov, L. Mihaylov, L. R. Bird, Ev. Vassileva, R. V. Kumar, M. Chhowalla and T. Spassov

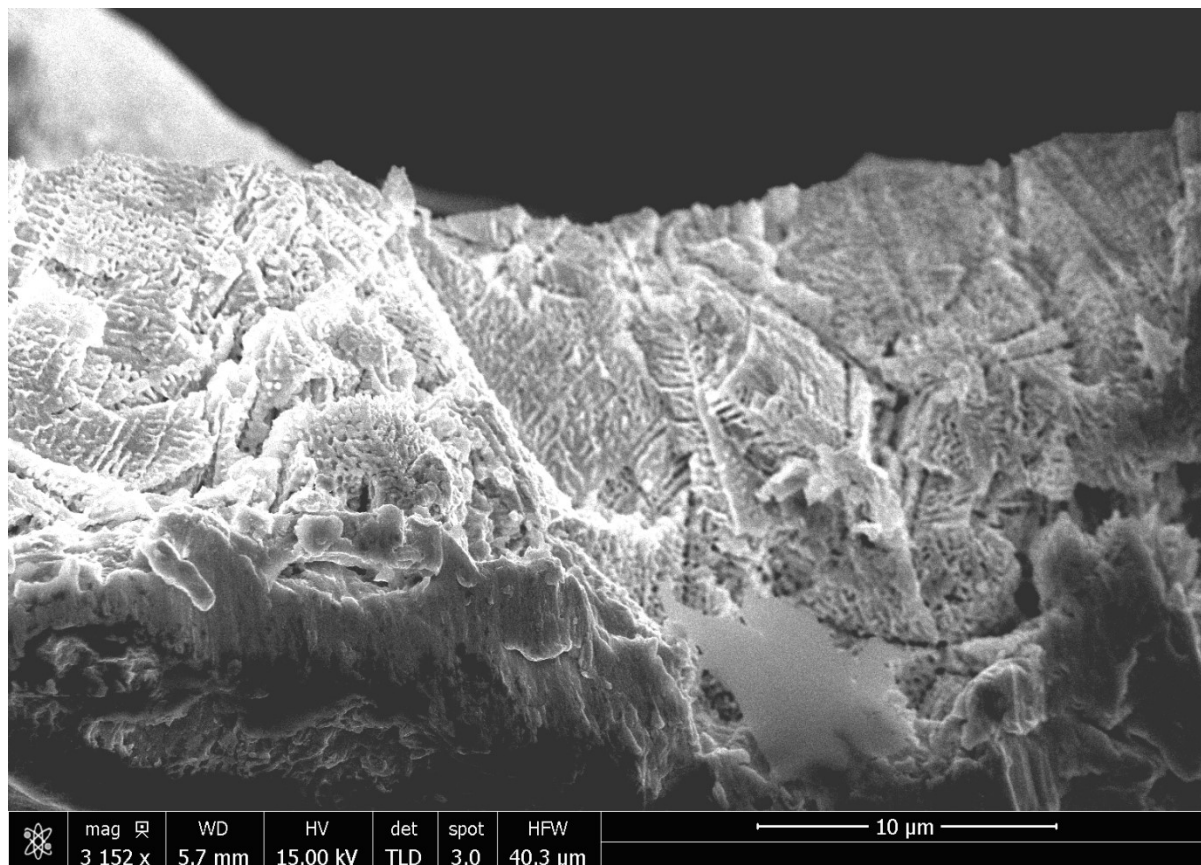

*Fig. S1. HR-SEM cross-section of bare de-alloyed electrode before reaction with sulphur.*

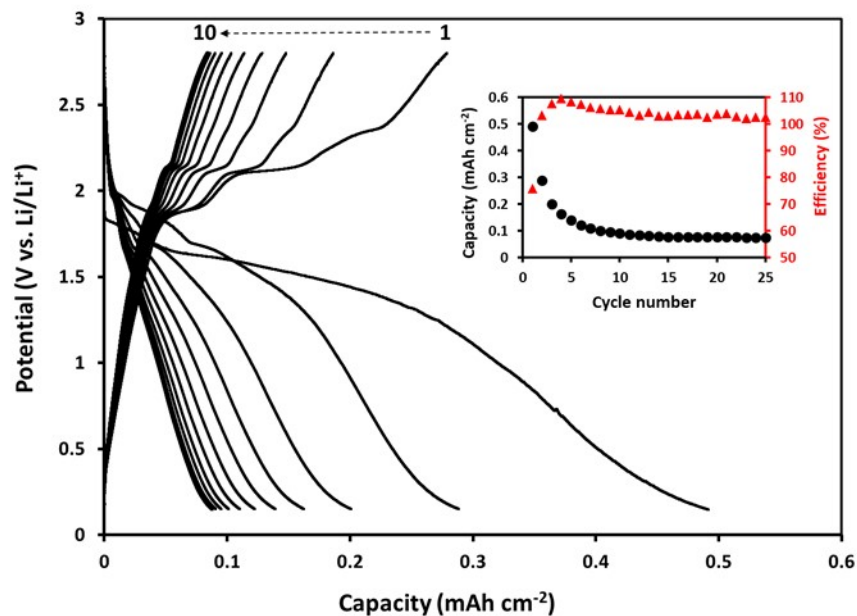

(a)

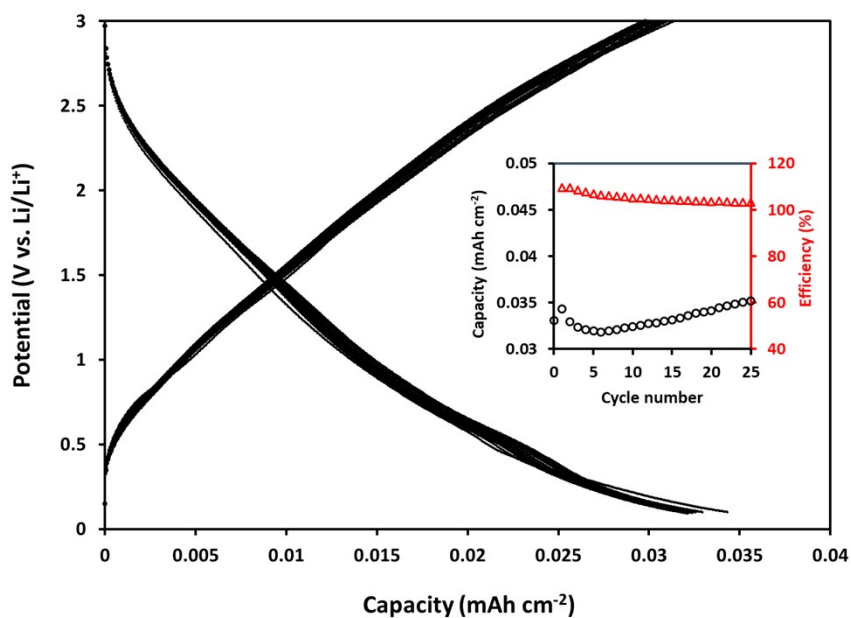

(b)

Fig. S2 Comparison of the volumetric energy densities of (a) for the first 10 cycles of  $\text{Ag}_2\text{S-Cu}_x\text{S}$  electrode and (b) bare Ag electrode at  $0.4 \text{ A g}^{-1}$  current rate. The insets demonstrate the evolution of the capacity and efficiency for the first 30 cycles.
